# Supplementary material for: Evidence about art-based interventions for Indigenous people: a scoping review protocol
Source: HighWire-hosted journal article supplement (doi:10.1136/bmjopen-2023-083448), 2024-06-01
Supplement: bmjopen-2023-083448supp001_data_supplement.pdf [file bmjopen-2023-083448supp001_data_supplement.pdf]

Search strategies for each database

Via OVID

1. APA PsycInfo

Coverage from 1806 to April Week 4 2024

Date of retrieval: 25-04-2024

- 1exp art therapy/ 5828
- 2movement therapy/ 1541
- 3Poetry Therapy/ 238
- 4psychodrama/ 2944
- 5Recreation Therapy/ 837
- 6educational therapy/ 382
- 7expressive psychotherapy/ 445
- 8narrative therapy/ 1300
- 9exp self-expression/ 1123
- 10creative writing/ 1622
- 111 or 2 or 3 or 4 or 5 or 6 or 7 or 8 or 9 or 10 15687
- 12(art adj2 (therap\* or psychotherap\* or intervention\*)).ti,ab. 7938
- 13((music or dance or movement or "visual art\*" or "creative art\*" or drama or recreation or play or expressive or narrative) adj2 (therap\* or psychotherap\* or intervention\* or treatment\*)).ti,ab. 18911
- 14(creative adj writing).ti,ab. 799
- 15(drama?therap\* or "healing circle\*" or drum\* or "folk healing").ti,ab. 2276
- 1612 or 13 or 14 or 15 28830
- 17exp treatment/ 1360012
- 18exp trauma/ 84489
- 19exp "recovery (disorders)"/ 15776
- 2017 or 18 or 19 1418785
- 21(therap\* or psychotherap\* or intervention\* or treatment\* or trauma\* or recover\* or counsel\*).ti,ab. 1126229
- 2220 or 21 1834894

|    |                                                                                                                                                                                                                                                                                        |        |
|----|----------------------------------------------------------------------------------------------------------------------------------------------------------------------------------------------------------------------------------------------------------------------------------------|--------|
| 23 | exp Arts/                                                                                                                                                                                                                                                                              | 61432  |
| 24 | singing/                                                                                                                                                                                                                                                                               | 1648   |
| 25 | Photographs/                                                                                                                                                                                                                                                                           | 4719   |
| 26 | storytelling/                                                                                                                                                                                                                                                                          | 6096   |
| 27 | exp communications media/                                                                                                                                                                                                                                                              | 109208 |
| 28 | creative writing/                                                                                                                                                                                                                                                                      | 1622   |
| 29 | poetry/                                                                                                                                                                                                                                                                                | 3700   |
| 30 | narratives/                                                                                                                                                                                                                                                                            | 26490  |
| 31 | Creative Writing/                                                                                                                                                                                                                                                                      | 1622   |
| 32 | creativity/                                                                                                                                                                                                                                                                            | 30132  |
| 33 | 23 or 24 or 25 or 26 or 27 or 28 or 29 or 30 or 31 or 32                                                                                                                                                                                                                               | 224612 |
| 34 | (artist* or "art form*" or "creative art*" or painting or photograph* or music* or (song or singing or songwriting) or storytell* or danc* or theat* or filmmak* or beading or wampum or embroider* or poetr* or drum* or yarn* or weaving or sculpt* or writing or creativit*).ti,ab. | 188531 |
| 35 | 33 or 34                                                                                                                                                                                                                                                                               | 339692 |
| 36 | 22 and 35                                                                                                                                                                                                                                                                              | 84822  |
| 37 | 16 or 36                                                                                                                                                                                                                                                                               | 100543 |
| 38 | exp indigenous populations/                                                                                                                                                                                                                                                            | 17428  |
| 39 | exp tribes/                                                                                                                                                                                                                                                                            | 1394   |
| 40 | two-spirit/                                                                                                                                                                                                                                                                            | 6      |
| 41 | 38 or 39 or 40                                                                                                                                                                                                                                                                         | 18413  |
| 42 | ((american or canadian or mexican or "north america" or "south america" or "central america" or australia or new-zealand) adj1 (indian* or native*)).ti,ab.                                                                                                                            | 9902   |
| 43 | (indigenous or aboriginal* or (first adj (nations or people*)) or maori or (inuit* or innuk) or "torres strait islander people*" or m?tis or cherokee or haudenosaunee or navajo or two-spirit*).ti,ab.                                                                                | 21380  |
| 44 | 42 or 43                                                                                                                                                                                                                                                                               | 30080  |
| 45 | 41 or 44                                                                                                                                                                                                                                                                               | 34713  |
| 46 | 37 and 45                                                                                                                                                                                                                                                                              | 1049   |
| 47 | ((healing or recover* or trauma*) adj1 (indigenous or aboriginal* or native*)).ti,ab.                                                                                                                                                                                                  | 271    |
| 48 | 35 and 47                                                                                                                                                                                                                                                                              | 30     |
| 49 | 46 or 48                                                                                                                                                                                                                                                                               | 1052   |

**2. Embase****Coverage from 1974 to 2024**

Date of retrieval: 25-04-2024

- 1 exp art therapy/ 5111
- 2 exp music therapy/ 9571
- 3 dance therapy/ 856
- 4 drama therapy/ 105
- 5 narrative therapy/ 545
- 6 storytelling/ 2130
- 7 1 or 2 or 3 or 4 or 5 or 6 17405
- 8 ((music or dance or movement or "visual art\*" or "creative art\*" or drama or recreation or play or expressive or narrative) adj2 (therap\* or psychotherap\* or intervention\* or treatment\*)).ti,ab. 17533
- 9 (drama?therap\* or storytell\* or "healing circle\*" or yarn\* or drum\* or "folk healing").ti,ab. 12419
- 10 8 or 9 29798
- 11 7 or 10 39507
- 12 exp indigenous people/ 37189
- 13 exp austronesian people/ 7212
- 14 exp eskimo-aleut people/ 3110
- 15 exp oceanic ancestry group/ 12219
- 16 exp amerind people/ 2572
- 17 exp na-dene people/ 347
- 18 12 or 13 or 14 or 15 or 16 or 17 54442
- 19 (indigenous or aboriginal or (first adj (nation\* or people\*)) or (((american or canadian or mexican or "north america\*" or "south america\*" or "central america\*" or australia\* or new-zealand) adj1 (indian\* or native\*)) or maori or (in?uit\* or innuk)) or "torres strait islander people\*" or m?tis or cherokee or haudenosaunee or navajo or two-spirit\*).ti,ab. 136566
- 20 18 or 19 160976
- 21 11 and 20 739

3. MEDLINE(R) ALL

Coverage from 1946 to April 25 2024

Date of retrieval: 25-04-2024

1exp Sensory Art Therapies/ 56036

2Art Therapy/ 1764

3Poetry as Topic/ 3059

4exp Psychodrama/ 3121

5Narrative Therapy/ 261

6Music Therapy/ 4480

7Dance Therapy/ 468

8Play Therapy/ 1203

91 or 2 or 3 or 4 or 5 or 6 or 7 or 8 62362

10(art adj2 (therap\* or psychotherap\* or intervention\*)).ti,ab. 19552

11((music or dance or movement or "visual art\*" or "creative art\*" or drama or recreation or play or expressive or narrative) adj2 (therap\* or psychotherap\* or intervention\* or treatment\*)).ti,ab. 12050

12(creative adj writing).ti,ab. 220

13(drama?therap\* or "healing circle\*" or drum\* or "folk healing").ti,ab. 6112

1410 or 11 or 12 or 13 37607

159 or 14 95726

16exp Psychotherapy/ 223187

17exp Counseling/ 49759

1816 or 17 267286

19(therap\* or psychotherap\* or intervention\* or treatment\* or trauma\* or recover\* or counsel\*).ti,ab. 5819159

2018 or 19 5931953

21exp Art/ 38527

22Music/ 17372

2321 or 22 55346

24(artist\* or "art form\*" or "creative art\*" or painting or photograph\* or music\* or (song or singing or songwriting) or storytell\* or danc\* or theat\* or filmmak\* or beading or wampum or embroider\* or poet\* or drum\* or yarn\* or weaving or sculpt\* or writing or creativit\*).ti,ab. 204710

|    |                                                                                                                                                                                                   |              |
|----|---------------------------------------------------------------------------------------------------------------------------------------------------------------------------------------------------|--------------|
| 25 | 23 or 24                                                                                                                                                                                          | 241398       |
| 26 | 20 and 25                                                                                                                                                                                         | 42802        |
| 27 | 26 or 15                                                                                                                                                                                          | 129223       |
| 28 | exp Indigenous Peoples/                                                                                                                                                                           | 37181        |
| 29 | exp Australasian People/                                                                                                                                                                          | 12934        |
| 30 | 28 or 29                                                                                                                                                                                          | 37328        |
| 31 | ((american or canadian or mexican or "north america" or "south america" or "central america" or australia or new-zealand) adj1 (indian* or native*)).                                             | ti,ab. 14539 |
| 32 | (indigenous or aboriginal* or (first adj (nations or people*)) or maori or (inuit* or innuk) or "torres strait islander people*" or m?tis or cherokee or haudenosaunee or navajo or two-spirit*). | ti,ab. 63189 |
| 33 | 31 or 32                                                                                                                                                                                          | 76548        |
| 34 | 30 or 33                                                                                                                                                                                          | 91540        |
| 35 | 27 and 34                                                                                                                                                                                         | 459          |
| 36 | ((healing or recover* or trauma*) adj1 (indigenous or aboriginal* or native*)).                                                                                                                   | ti,ab. 231   |
| 37 | 35 or 36                                                                                                                                                                                          | 686          |

Via Proquest

4. ERIC

Coverage from 1966 to April 25<sup>th</sup> 2024

Date of retrieval: 25-04-2024

|    |                                                                                                                                                                                                                                                                                                                                                                                                                                                                                                              |       |
|----|--------------------------------------------------------------------------------------------------------------------------------------------------------------------------------------------------------------------------------------------------------------------------------------------------------------------------------------------------------------------------------------------------------------------------------------------------------------------------------------------------------------|-------|
| S1 | "art therap*" OR "art intervention*" OR "art treatment*" OR "music therap*" OR "dance therap*" OR "movement therap*" OR "creative arts therap*" OR "poetry therap*" OR (dramatherap* OR drama-therap* OR "drama therap*") OR "recreation therap*" OR "play therap*" OR "educational therap*" OR "expressive psychotherap*" OR "expressive therap*" OR "narrative therap*" OR "narrative practice*" OR (healing AND circle*) OR "healing art*" OR self-expression OR "creative writing" OR "creative therap*" | 10225 |
| S2 | subject("Art therapy" OR "Music Therapy" OR "Dance therapy" OR "Educational Therapy" OR "Self Expression" OR "Creative Writing")                                                                                                                                                                                                                                                                                                                                                                             | 7568  |
| S3 | [S1] OR [S2]                                                                                                                                                                                                                                                                                                                                                                                                                                                                                                 | 10225 |
| S4 | aboriginal* OR "first people*" OR "plains indian*" OR abenaki* OR navajo OR quechua* OR Maori OR (in?uit* OR innuk*) OR "torres strait islander people*" OR m?tis OR eskimo* OR (pima OR pimas) OR "oceanic ancestry" OR cherokee* OR two-spirit*                                                                                                                                                                                                                                                            | 12948 |

|    |                                                                                                                                                                                                                                                                                                                                                                                                                                                                                                     |       |
|----|-----------------------------------------------------------------------------------------------------------------------------------------------------------------------------------------------------------------------------------------------------------------------------------------------------------------------------------------------------------------------------------------------------------------------------------------------------------------------------------------------------|-------|
| S5 | subject("Aboriginal Australians" OR "Aboriginal People" OR "Indigenous Knowledge" OR "Indigenous Personnel" OR "Indigenous Populations" OR "American Indians" OR "American Indian Culture" OR "American Indian Education" OR "American Indian Studies" OR "American Indian Studies" OR "Nonreservation American Indians" OR "Reservation American Indians" OR "American Indian Reservations" OR "Urban American Indians" OR "Canada Natives" OR Navajo OR "Navajo (Nation)" OR "Pacific Islanders") | 26652 |
| S6 | [S4] OR [S5]                                                                                                                                                                                                                                                                                                                                                                                                                                                                                        | 33883 |
| S7 | [S3] AND [S6]                                                                                                                                                                                                                                                                                                                                                                                                                                                                                       | 206   |

## 5. International Bibliography of the Social Sciences

### Coverage from 1951 to 25 april 2024

Date of retrieval: 25-04-2024

|    |                                                                                                                                                                                                                                                                                                                                                                                                                                                                                                          |       |
|----|----------------------------------------------------------------------------------------------------------------------------------------------------------------------------------------------------------------------------------------------------------------------------------------------------------------------------------------------------------------------------------------------------------------------------------------------------------------------------------------------------------|-------|
| S1 | "art therap*" OR "art intervention*" OR "art treatment*" OR "music therap*" OR "dance therap*" OR "movement therap*" OR "creative arts therap*" OR "poetry therap*" OR (dramatherap* OR drama-therap* OR "drama therap*") OR "recreation therap*" OR "play therap*" OR "educational therap*" OR "expressive psychotherap*" OR "expressive therap*" OR "narrative therap*" OR "narrative practice*" OR "healing circle*" OR "healing art*" OR self-expression OR "creative writing" OR "creative therap*" | 14364 |
| S2 | subject("Art therapy" OR "Music therapy" OR "Dance therapy" OR "Movement therapy" OR "Drama therapy" OR "Recreation therapy")                                                                                                                                                                                                                                                                                                                                                                            | 261   |
| S3 | [S1] OR [S2]                                                                                                                                                                                                                                                                                                                                                                                                                                                                                             | 14351 |
| S4 | aboriginal* OR "first people*" OR "plains indian*" OR abenaki* OR navajo OR quechua* OR Maori OR (inuit* OR innuit* OR innuk*) OR "torres strait islander people" OR m?tis OR eskimo* OR (pima OR pimas) OR "oceanic ancestry" OR cherokee* OR two-spirit*                                                                                                                                                                                                                                               | 50030 |
| S5 | subject("Indigenous communities" OR "Indigenous nations" OR "Indigenous people" OR "Aboriginal art" OR "American Indian communities" OR "Ocenaic cultural groups")                                                                                                                                                                                                                                                                                                                                       | 1142  |
| S6 | [S4] OR [S5]                                                                                                                                                                                                                                                                                                                                                                                                                                                                                             | 50877 |
| S7 | [S3] AND [S6]                                                                                                                                                                                                                                                                                                                                                                                                                                                                                            | 1453  |

6. National Criminal Justice Reference Service Database

Coverage from 1975 to 25 april 2024

Date of retrieval: 25-04-2024

|    |                                                                                                                                                                                                                                                                                                                                                                                                                                                                                       |      |
|----|---------------------------------------------------------------------------------------------------------------------------------------------------------------------------------------------------------------------------------------------------------------------------------------------------------------------------------------------------------------------------------------------------------------------------------------------------------------------------------------|------|
| S1 | “art therap*” OR "art intervention*" OR "art treatment*" OR "music therap*" OR "dance therap*" OR "movement therap*" OR "creative arts therap*" OR "poetry therap*" OR (dramatherap* OR drama-therap* OR "drama therap*") OR "recreation therap*" OR "play therap*" OR "educational therap*" OR "expressive psychotherap*" OR "expressive therap*" OR "narrative therap*" OR "narrative practice*" OR circle* OR "healing art*" OR self-expression OR "creative writing" OR peacemak* | 941  |
| S2 | subject("Art Therapy" OR Recreation)                                                                                                                                                                                                                                                                                                                                                                                                                                                  | 271  |
| S3 | [S1] OR [S2]                                                                                                                                                                                                                                                                                                                                                                                                                                                                          | 1169 |
| S4 | (canadian OR american OR mexican OR australian* OR alaska* OR hawaii* OR plain*) NEAR/2 (indian* OR native*) OR indigenous OR "first people*" OR "plains indian*" OR abenaki* OR navajo OR quechua* OR Maori OR (inuit* OR innuit* OR innuk*) OR "torres strait islander people" OR m?tis OR eskimo* OR (pima OR pimas) OR "oceanic ancestry" OR cherokee* OR two-spirit*                                                                                                             | 2801 |
| S5 | subject("Canadian Indians"" OR "American Indians" OR "Alaska Natives" OR "Native Hawaiians or "Other Pacific Islanders" OR "American Indians/Alaska Natives" OR Maoris OR Eskimos)                                                                                                                                                                                                                                                                                                    | 138  |
| S6 | [S4] OR [S5]                                                                                                                                                                                                                                                                                                                                                                                                                                                                          | 2801 |
| S7 | [S3] AND [S6]                                                                                                                                                                                                                                                                                                                                                                                                                                                                         | 72   |

7. National Criminal Justice Database (NCJRS)

Coverage from 1979 to 25 April 2025

Date of retrieval: 25-04-2024

|    |                                                                                                                                                                                                                                                                                                                                                                                                                                                                                                                                                                                                                                                                                                                                         |      |
|----|-----------------------------------------------------------------------------------------------------------------------------------------------------------------------------------------------------------------------------------------------------------------------------------------------------------------------------------------------------------------------------------------------------------------------------------------------------------------------------------------------------------------------------------------------------------------------------------------------------------------------------------------------------------------------------------------------------------------------------------------|------|
| S1 | ("art therapist" OR "art therapists" OR "art therapy") OR ("art intervention" OR "art interventions") OR ("art treatment") OR ("music therapist" OR "music therapists" OR "music therapy") OR ("dance therapy") OR "movement therap" OR "visual arts intervention*" OR "visual arts therap*" OR "creative arts therap*" OR "poetry therap*" OR (dramatherap* OR drama-therap* OR ("drama therapist" OR "drama therapy")) OR "recreation therap*" OR ("play therapy") OR ("educational therapy") OR "expressive psychotherap*" OR ("expressive therapy") OR ("narrative therapy") OR "narrative practice*" OR "creative writing" OR self-expression OR ("healing circles") OR (healing AND circle*) OR ("healing art" OR "healing arts") | 5269 |
|----|-----------------------------------------------------------------------------------------------------------------------------------------------------------------------------------------------------------------------------------------------------------------------------------------------------------------------------------------------------------------------------------------------------------------------------------------------------------------------------------------------------------------------------------------------------------------------------------------------------------------------------------------------------------------------------------------------------------------------------------------|------|

|     |                                                                                                                                                                                                                                                                                                                                                                                                                                                                |       |
|-----|----------------------------------------------------------------------------------------------------------------------------------------------------------------------------------------------------------------------------------------------------------------------------------------------------------------------------------------------------------------------------------------------------------------------------------------------------------------|-------|
| S2  | subject("Art therapy" OR "Music therapy" OR "Dance therapy" OR "Movement therapy" OR "Narrative therapy" OR (Self-expression OR "Self expression") OR "Recreational therapy" OR "Creative therapy")                                                                                                                                                                                                                                                            | 863   |
| S3  | [S1] OR [S2]                                                                                                                                                                                                                                                                                                                                                                                                                                                   | 5449  |
| S4  | aborigin* OR indigenous OR ("first nation" OR "first nations") OR "first people*" OR ((canadian OR american OR mexican OR australia* OR alaska* OR hawaii* OR plain*) NEAR/2 (indian* OR native*)) OR "plains indian*" OR abenaki* OR maya* OR navajo OR quechua* OR Maori OR (inuit* OR innuit* OR innuk*) OR "torres strait islander people" OR m?tis OR "pacific Islander*" OR eskimo* OR (pima OR pimas) OR "oceanic ancestry" OR cherokee* OR two-spirit* | 20457 |
| S5  | subject("Indigenous populations" OR "American Indians" OR "Aboriginal Australians" OR "Indigenous Peoples" OR "Native American/Native Americans (1979-1985)" OR "Native born citizens" OR "Indian/Indians (1964-1985)" OR "North American cultural groups" OR Mayans OR Maoris OR Eskimos OR Inuit OR Cherokees)                                                                                                                                               | 4213  |
| S6  | [S4] OR [S5]                                                                                                                                                                                                                                                                                                                                                                                                                                                   | 20471 |
| S7  | [S3] AND [S6]                                                                                                                                                                                                                                                                                                                                                                                                                                                  | 1016  |
| S8  | (indigenous OR aboriginal OR native) NEAR/5 (healing OR recovery OR rehabilitat*)                                                                                                                                                                                                                                                                                                                                                                              | 546   |
| S9  | art OR arts OR artist* OR danc* OR music* OR (song OR singing OR singer) OR "oral tradition*" OR theat* OR (drum OR drums OR drumming OR drummer*) OR painting* OR decorat* OR "visual art*" OR "creative writing*" OR storytell* OR (storymak* OR story-mak*) OR poetry OR "community art*" OR photograph* OR yarn* OR (beading OR beadwork*) OR wampum OR embroider* OR weaving* OR "social media*" OR sculpt*                                               | 37696 |
| S10 | subject(Arts OR Art OR Artists OR "Art Works" OR "Creative art" OR "Artistic movements" OR Culture OR Music OR Musicians OR Theater OR Play OR "Visual Arts" OR Writing OR Storytelling OR Poetry OR Photography OR Sculpture OR "Digital Media" OR "Computer mediated communication" OR "Interactive media" OR "Mass media" OR "Mass media effects" OR "Mass media images" OR "Media influences")                                                             | 16297 |
| S11 | [S9] OR [S10]                                                                                                                                                                                                                                                                                                                                                                                                                                                  | 47667 |
| S12 | [S8] AND [S11]                                                                                                                                                                                                                                                                                                                                                                                                                                                 | 288   |
| S13 | [S7] OR [S12]                                                                                                                                                                                                                                                                                                                                                                                                                                                  | 1173  |

## 8. Sociological Abstracts

### Coverage from 192 to 25 April 2024

Date of retrieval: 25-04-2024



|    |                                                                                                                                                                                                                                                                                                                                                                                                                                                                                    |       |
|----|------------------------------------------------------------------------------------------------------------------------------------------------------------------------------------------------------------------------------------------------------------------------------------------------------------------------------------------------------------------------------------------------------------------------------------------------------------------------------------|-------|
| S1 | "art therap*" OR "art intervention*" OR "art treatment*" OR "music therap*" OR "dance therap*" OR "movement therap*" OR "creative arts therap*" OR "poetry therap*" OR (dramatherap* OR drama-therap* OR "drama therap*") OR "recreation therap*" OR "play therap*" OR "educational therap*" OR "expressive psychotherap*" OR "expressive therap*" OR "narrative therap*" OR "narrative practice*" OR "healing circle*" OR "healing art*" OR self-expression OR "creative writing" | 10360 |
| S2 | subject("Art therapy" OR "Self expression")                                                                                                                                                                                                                                                                                                                                                                                                                                        | 1144  |
| S3 | [S1] OR [S2]                                                                                                                                                                                                                                                                                                                                                                                                                                                                       | 10360 |
| S4 | "first people*" OR "plains indian*" OR abenaki* OR navajo OR quechua* OR Maori OR (inuit* OR innuit* OR innuk*) OR "torres strait islander people" OR m?tis OR eskimo* OR (pima OR pimas) OR "oceanic ancestry" OR cherokee* OR two-spirit*                                                                                                                                                                                                                                        | 15841 |
| S5 | subject("Indigenous peoples" OR Aboriginal Australians OR "Native born citizens" OR "Native American/Native Americans (1979-1985)" OR Mayans OR Maoris OR Eskimos OR Inuit OR Cherokees OR "Pacific islander people")                                                                                                                                                                                                                                                              | 12656 |
| S6 | [S4] OR [S5]                                                                                                                                                                                                                                                                                                                                                                                                                                                                       | 25200 |
| S7 | [S3] AND [S6]                                                                                                                                                                                                                                                                                                                                                                                                                                                                      | 551   |

EBSCO

## 9. Anthropology Plus

**Coverage: 19<sup>th</sup> century to April 25<sup>th</sup> 2024**

Date of retrieval: 25-04-2024

|    |                                                                                                                                                                                                                                                                                                                                                                        |       |
|----|------------------------------------------------------------------------------------------------------------------------------------------------------------------------------------------------------------------------------------------------------------------------------------------------------------------------------------------------------------------------|-------|
| S1 | "art intervention*" OR "art therap*" OR "music therap*" OR "recreational therap*" OR "dance therap*" OR "creative arts therap*" OR "narrative therap*" OR "healing art*" OR "healing rit*" OR "healing circle*" OR Self-Expression OR storytell* OR yarnning OR wampum OR (beading OR beadwork*)                                                                       | 2465  |
| S2 | SU ("art therapy" OR "music therapy" OR "dance therapy" OR "dance -- therapeutic use" OR "play therapy" OR "dance -- religious aspects" OR "digital storytelling" OR storytelling)                                                                                                                                                                                     | 1668  |
| S3 | S1 OR S2                                                                                                                                                                                                                                                                                                                                                               | 2481  |
| S4 | (canadian OR american OR mexican OR australiano* OR alaska* OR hawaii* OR plain*) N2 (indian* OR native*) OR indigenous OR "first people*" OR "plains indian*" OR abenaki* OR navajo OR quechua* OR Maori OR (inuit* OR innuit* OR innuk*) OR "torres strait islander people" OR m?tis OR eskimo* OR (pima OR pimas) OR "oceanic ancestry" OR cherokee* OR two-spirit* | 53272 |

|     |                                                                                                                                                                                                                                                                                                                                                                                                                                                                                                                                                                                                                                                                                                                                                                                                                                                                                  |       |
|-----|----------------------------------------------------------------------------------------------------------------------------------------------------------------------------------------------------------------------------------------------------------------------------------------------------------------------------------------------------------------------------------------------------------------------------------------------------------------------------------------------------------------------------------------------------------------------------------------------------------------------------------------------------------------------------------------------------------------------------------------------------------------------------------------------------------------------------------------------------------------------------------|-------|
| S5  | SU ("algonquian indians" OR "indigenous peoples - religion" OR "art, aboriginal australians" OR "pacific islanders" OR "aboriginal australians" OR "indians of north america" OR "south american indians" OR "first nations" OR "indigenous peoples" OR "indigenous women" OR "north american indians" OR "central american indians" OR maori OR "indian women" OR inuits OR navajo OR eskimos OR "inuit -- religion" OR "Torres Strait Islanders" OR "australian aborigines" OR "aboriginal australians" OR (maya OR mayan OR mayas) OR "mayas -- religion" OR "two-spirit peoples" OR "indians of north america -- social aspects" OR "indigenous art" OR "mexican indians" OR "australian aboriginals" OR "indigenous children" OR "indigenous youth" OR "art, aboriginal australians" OR "californian indians" OR "alaska natives" OR "american indians" OR "plain indians") | 52900 |
| S6  | S4 OR S5                                                                                                                                                                                                                                                                                                                                                                                                                                                                                                                                                                                                                                                                                                                                                                                                                                                                         | 74327 |
| S7  | S3 AND S6                                                                                                                                                                                                                                                                                                                                                                                                                                                                                                                                                                                                                                                                                                                                                                                                                                                                        | 629   |
| S8  | (indigenous OR aboriginal OR native) W5 healing                                                                                                                                                                                                                                                                                                                                                                                                                                                                                                                                                                                                                                                                                                                                                                                                                                  | 41    |
| S9  | drawing OR painting OR storytell* OR arts OR art OR song OR dance OR singing OR photograph* OR "visual art*" OR media* OR music OR embroidery                                                                                                                                                                                                                                                                                                                                                                                                                                                                                                                                                                                                                                                                                                                                    | 84297 |
| S10 | SU (SU (drawing* OR arts OR art OR artists OR songs OR singing OR "digital media" OR poetry OR creativity OR "fine arts"))                                                                                                                                                                                                                                                                                                                                                                                                                                                                                                                                                                                                                                                                                                                                                       | 39490 |
| S11 | S9 OR S10                                                                                                                                                                                                                                                                                                                                                                                                                                                                                                                                                                                                                                                                                                                                                                                                                                                                        | 87514 |
| S12 | S8 AND S11                                                                                                                                                                                                                                                                                                                                                                                                                                                                                                                                                                                                                                                                                                                                                                                                                                                                       | 3     |
| S13 | S7 OR S12                                                                                                                                                                                                                                                                                                                                                                                                                                                                                                                                                                                                                                                                                                                                                                                                                                                                        | 631   |

## 10. Art Full Text

**Coverage: From 1982 to April 25<sup>th</sup> 2024**

Date of retrieval: 25-04-2024

|    |                                                                                                                                                                                                                                                                                                                                                                                                                                                                                                                                                                                                           |       |
|----|-----------------------------------------------------------------------------------------------------------------------------------------------------------------------------------------------------------------------------------------------------------------------------------------------------------------------------------------------------------------------------------------------------------------------------------------------------------------------------------------------------------------------------------------------------------------------------------------------------------|-------|
| S1 | "art intervention*" OR "art therap*" OR "art treatment*" OR "music therap*" OR "visual arts intervention*" OR "dance therap*" OR "healing art*" OR "movement therap*" OR "creative arts therap*" OR "recreation therap*" OR "self-expression" OR "educational therap*" OR "expressive psychotherap*" OR "expressive therap*" OR "healing circle*" OR storytell* OR "narrative therap*" OR yarning OR "recreation therapy" OR "educational therapy" OR "creative arts therap*" OR "dance therap*" OR "poetry therapy" OR "movement therap*" OR "drama therap*" OR yarn* OR drum* OR (beading OR beadwork*) | 12751 |
| S2 | SU ("Art therapy" OR "Art therapists" OR "Art therapy education" OR "Psychotherapy in art" OR "Narrative art" OR Self-expression OR "Healing in art" OR "self expression")                                                                                                                                                                                                                                                                                                                                                                                                                                | 3365  |
| S3 | S1 OR S2                                                                                                                                                                                                                                                                                                                                                                                                                                                                                                                                                                                                  | 12751 |

|    |                                                                                                                                                                                                                                                                                                      |       |
|----|------------------------------------------------------------------------------------------------------------------------------------------------------------------------------------------------------------------------------------------------------------------------------------------------------|-------|
| S4 | indigenous OR aborigin* OR ("first nation" OR "first nations") OR "first people*" OR "plains indian*" OR abenaki* OR navajo OR quechua* OR Maori OR (in?uit* OR innuk*) OR "torres strait islander people*" OR m?tis OR eskimo* OR (pima OR pimas) OR "oceanic ancestry" OR cherokee* OR two-spirit* | 20167 |
| S5 | SU ("Indigenous art" OR "First Nations art" OR "Maya art" OR "Navajo art" OR "Maori art" OR "Inuit art" OR "Pacific Island art" OR "Eskimo art")                                                                                                                                                     | 3128  |
| S6 | S4 OR S5                                                                                                                                                                                                                                                                                             | 21798 |
| S7 | S3 AND S6                                                                                                                                                                                                                                                                                            | 377   |
| S8 | (indigenous OR aboriginal OR native) W5 healing                                                                                                                                                                                                                                                      | 19    |
| S9 | S7 OR S8                                                                                                                                                                                                                                                                                             | 393   |

## 11. Atlas Religion Database with AtlaSerial

**Coverage: From 1960 to April 25<sup>th</sup> 2024**

Date of retrieval: 25-04-2024

|    |                                                                                                                                                                                                                                                                                                                                                                                                                                                                                                                                                                                                                                                                                                                                                                                                                                                         |        |
|----|---------------------------------------------------------------------------------------------------------------------------------------------------------------------------------------------------------------------------------------------------------------------------------------------------------------------------------------------------------------------------------------------------------------------------------------------------------------------------------------------------------------------------------------------------------------------------------------------------------------------------------------------------------------------------------------------------------------------------------------------------------------------------------------------------------------------------------------------------------|--------|
| S1 | "art therap*" OR "music therap*" OR "dance therap*" OR "movement therap*" OR "poetry therapy" OR "educational therap*" OR "expressive psychotherap*" OR "healing art*" OR "drama therap*" OR "expressive therap*" OR "narrative therap*" OR self#expression OR "healing circle"                                                                                                                                                                                                                                                                                                                                                                                                                                                                                                                                                                         | 242    |
| S2 | SU ("art therapy" OR "music therapy" OR "dance therapy" OR "dance, religious" OR "narrative therapy")                                                                                                                                                                                                                                                                                                                                                                                                                                                                                                                                                                                                                                                                                                                                                   | 1158   |
| S3 | S1 OR S2                                                                                                                                                                                                                                                                                                                                                                                                                                                                                                                                                                                                                                                                                                                                                                                                                                                | 1184   |
| S4 | (canadian OR american OR mexican OR australian* OR alaska* OR hawaii* OR plain*) N2 (indian* OR native*) OR indigenous OR "first people*" OR "plains indian*" OR abenaki* OR navajo OR quechua* OR Maori OR (in*uit* OR innuk*) OR "torres strait islander people*" OR m?tis OR eskimo* OR (pima OR pimas) OR "oceanic ancestry" OR cherokee* OR two-spirit*                                                                                                                                                                                                                                                                                                                                                                                                                                                                                            | 683606 |
| S5 | SU ("indigenous peoples of north america -- religion" OR "indigenous peoples - religion" OR "indigenous knowledge" OR "pacific islanders" OR "aboriginal australians" OR "aboriginal australians -- religion" OR "indigenous peoples of north america -- identity" OR "indigenous peoples" OR indigenous peoples of north america" OR "indigenous peoples of south america - religion" OR "indigenous peoples of south americas" OR "maori (new zealand people) -- religion" OR "maori (new zealand people)" OR "indigenous peoples of mexico" OR "indigenous peoples of central america" OR "indigenous peoples of mexico -- religion" OR Inuit OR "artic peoples" OR Eskimos OR "inuit -- religion" OR "navajo (north american people)" OR "Torres Strait Islanders" OR "indigenous peoples in art" OR "aboriginal australians" OR Mayas OR "mayas -- | 9848   |

|     |                                                                                                                                                                                                                                                                                                                                                                                                                  |        |
|-----|------------------------------------------------------------------------------------------------------------------------------------------------------------------------------------------------------------------------------------------------------------------------------------------------------------------------------------------------------------------------------------------------------------------|--------|
|     | religion" OR "two-spirit people" OR "american indian movement" OR "society of american indians")                                                                                                                                                                                                                                                                                                                 |        |
| S6  | S4 OR S5                                                                                                                                                                                                                                                                                                                                                                                                         | 684007 |
| S7  | S3 AND S6                                                                                                                                                                                                                                                                                                                                                                                                        | 345    |
| S8  | (indigenous OR aboriginal OR native) W5 (healing OR recover*)                                                                                                                                                                                                                                                                                                                                                    | 58     |
| S9  | art OR arts OR artist* OR danc* OR music* OR (song OR singing OR singer) OR "oral tradition*" OR theat* OR (drum OR drums OR drumming OR drummer*) OR painting* OR decorat* OR "visual art*" OR "creative writing*" OR storytell* OR (storymak* OR story-mak*) OR poetry OR "community art*" OR photograph* OR yarn* OR (beading OR beadwork*) OR wampum OR embroider* OR weaving* OR "social media*" OR sculpt* | 140418 |
| S10 | SU (Art OR Arts OR Artists OR Dance OR Singing OR "Otral tradition" OR Theater OR "Creative writing" OR Storytelling OR Drum OR Painting OR Poetry OR "Community arts projects" OR Photography OR Embroidery OR Weaving OR "Social media" OR Sculpture)                                                                                                                                                          | 62608  |
| S11 | S9 OR S10                                                                                                                                                                                                                                                                                                                                                                                                        | 140418 |
| S12 | S8 AND S11                                                                                                                                                                                                                                                                                                                                                                                                       | 5      |
| S13 | S7 OR S12                                                                                                                                                                                                                                                                                                                                                                                                        | 350    |

## 12. Bibliography of Indigenous Peoples in North America

**Coverage: 16<sup>th</sup> century to April 25<sup>th</sup> 2024**

Date of retrieval: 25-04-2024

|    |                                                                                                                                                                                                                                                                                                                                                                           |     |
|----|---------------------------------------------------------------------------------------------------------------------------------------------------------------------------------------------------------------------------------------------------------------------------------------------------------------------------------------------------------------------------|-----|
| S1 | "art intervention*" OR "art therap*" OR "music therap*" OR "recreational therap*" OR "dance therap*" OR "creative arts therap*" OR "poetry therap*" OR "play therap*" OR "healing art*" OR "healing rit*" OR "healing circle*" OR self#expression OR "expressive therap*" OR yarn* OR wampum OR ((beading OR beadwork*) OR storytell*) N10 (heal* OR recover* OR trauma*) | 334 |
| S2 | SU ("art therap*" OR "expressive arts therap*" OR "music therapy for children" OR "drama therap*")                                                                                                                                                                                                                                                                        | 14  |
| S3 | S1 OR S2                                                                                                                                                                                                                                                                                                                                                                  | 335 |

## 13. CINAHL Complete

**Date of coverage: 1937 to april 25<sup>th</sup> 2024**

Date of retrieval: 25-04-2024

|    |                                                                                                                                                                                                                                                                                                                                                                                                                                                                                       |       |
|----|---------------------------------------------------------------------------------------------------------------------------------------------------------------------------------------------------------------------------------------------------------------------------------------------------------------------------------------------------------------------------------------------------------------------------------------------------------------------------------------|-------|
| S1 | "art therap*" OR "art intervention*" OR "art treatment*" OR "music therap*" OR "dance therap*" OR "movement therap*" OR "creative arts therap*" OR "poetry therap*" OR (dramatherap* OR drama-therap* OR "drama therap*") OR "recreation therap*" OR "play therap*" OR "educational therap*" OR "expressive psychotherap*" OR "expressive therap*" OR "narrative therap*" OR "narrative practice*" OR circle* OR "healing art*" OR self-expression OR "creative writing" OR peacemak* | 29085 |
| S2 | MH ("Creative Arts Therapy+" OR "Creative Arts Therapists+" OR "Recreational Therapy+" OR "Play Therapy"+" OR Writing+ OR Singing+ OR Art+)                                                                                                                                                                                                                                                                                                                                           | 59369 |
| S3 | S1 OR S2                                                                                                                                                                                                                                                                                                                                                                                                                                                                              | 70831 |
| S4 | (canadian OR american OR mexican OR australian* OR alaska* OR hawaii* OR plain*) N2 (indian* OR native*) OR indigenous OR "first people*" OR "plains indian*" OR abenaki* OR navajo OR quechua* OR Maori OR (inuit* OR innuit* OR innuk*) OR "torres strait islander people" OR m?tis OR eskimo* OR (pima OR pimas) OR "oceanic ancestry" OR cherokee* OR two-spirit*                                                                                                                 | 33622 |
| S5 | MH ("Indigenous Peoples+" OR "Health Services, Indigenous" OR "Indigenous Health")                                                                                                                                                                                                                                                                                                                                                                                                    | 25103 |
| S6 | S4 OR S5                                                                                                                                                                                                                                                                                                                                                                                                                                                                              | 36891 |
| S7 | S3 AND S6                                                                                                                                                                                                                                                                                                                                                                                                                                                                             | 558   |

#### 14. Criminal Justice Abstracts

Coverage: 20<sup>th</sup> century to April 25<sup>th</sup> 2024

Date of retrieval: 25-04-2024

|    |                                                                                                                                                                                                                                                                                                                                                                                                  |      |
|----|--------------------------------------------------------------------------------------------------------------------------------------------------------------------------------------------------------------------------------------------------------------------------------------------------------------------------------------------------------------------------------------------------|------|
| S1 | "art therap*" OR "music therap*" OR "dance therap*" OR "self-expression" OR "educational therap*" OR storytell* OR "movement therap*" OR "play therap*" OR "poetry therap*" OR (dramatherap* OR drama-therap* OR "drama therap*") OR "recreation therap*" OR "narrative therap*" OR "narrative practice*" OR "creative writing" OR "self-expression" OR (beading OR beadwork*) OR yarn* OR drum* | 844  |
| S2 | SU ("art therapy" OR "music therapy" OR "dance therapy" OR "poetry therapy" OR "movement therapy" OR "play therapy" OR "drama therapy" OR "narrative therapy" OR self-expression OR storytelling OR "creative writing" OR yarn OR "healing circles")                                                                                                                                             | 805  |
| S3 | S1 OR S2                                                                                                                                                                                                                                                                                                                                                                                         | 1307 |
| S4 | (canadian OR american OR mexican OR australian* OR alaska* OR hawaii* OR plain*) N2 (indian* OR native*) OR indigenous OR "first people*" OR "plains indian*" OR abenaki* OR navajo OR quechua* OR Maori OR (in?uit* OR innuk*) OR "torres strait islander people*" OR m?tis OR eskimo* OR (pima OR pimas) OR "oceanic ancestry" OR cherokee* OR two-spirit*                                     | 8317 |

|    |                                                                                                                                                                                                                                                                                                                                                                                                                      |      |
|----|----------------------------------------------------------------------------------------------------------------------------------------------------------------------------------------------------------------------------------------------------------------------------------------------------------------------------------------------------------------------------------------------------------------------|------|
| S5 | SU ("aboriginal australian art" OR "aboriginal australian children" OR "indigenous australians" OR "indigenous children" OR "first nations of canada" OR "navajo (north american people)" OR "quechua (south american people)" OR "maori (new zealand people)" OR Inuit OR "torres strait islanders" OR Metis OR eskimos OR "cherokee (north american people)" OR "two-spirit people" OR "native american children") | 674  |
| S6 | S4 OR S5                                                                                                                                                                                                                                                                                                                                                                                                             | 8353 |
| S7 | S3 AND S6                                                                                                                                                                                                                                                                                                                                                                                                            | 47   |

## 15. Family Studies Abstracts

### Coverage from 1937 to 2024

Date of retrieval: 25-04-2024

|    |                                                                                                                                                                                                                                                                                                                                                                                                                                                                                                                                                      |      |
|----|------------------------------------------------------------------------------------------------------------------------------------------------------------------------------------------------------------------------------------------------------------------------------------------------------------------------------------------------------------------------------------------------------------------------------------------------------------------------------------------------------------------------------------------------------|------|
| S1 | "art therap*" OR "art treatment*" OR "music therap*" OR "dance therap*" OR "movement therap*" OR "creative arts therap*" OR "self-expression" OR "educational therap*" OR storytell* OR "narrative therap*" OR yarning OR "recreation therapy" OR Narratives OR "play therap*" OR (beading OR beadwork*)                                                                                                                                                                                                                                             | 284  |
| S2 | SU ("art therapy" OR "music therapy" OR arts OR art OR narratives OR "narrative therapy")                                                                                                                                                                                                                                                                                                                                                                                                                                                            | 1221 |
| S3 | S1 OR S2                                                                                                                                                                                                                                                                                                                                                                                                                                                                                                                                             | 1385 |
| S4 | "first Nation*" OR maori OR native* OR "american Indians*" OR in?uit OR "pacific islander*" OR two-spirit* OR "canadian indian*" OR aborigin* OR "slaska sative*" OR "native hawaiian*" OR "torres strait islander*" OR "native american*"                                                                                                                                                                                                                                                                                                           | 1497 |
| S5 | SU ("alaska natives" OR "pacific islanders" OR "aboriginal australians" OR "native americans" OR "indigenous peoples" OR "indigenous australians" OR maori (new zealand people) OR "first nations of canada" OR "indigenous peoples of the americas" OR "aboriginal canadians" OR "indigenous women" OR inuit OR "Torres Strait Islanders" OR "navajo (north american people)" OR "indigenous children" OR "aboriginal australians" OR "indigenous peoples" OR "indigenous youth" OR mayas OR "native american children" OR "native american women") | 615  |
| S6 | S4 OR S5                                                                                                                                                                                                                                                                                                                                                                                                                                                                                                                                             | 1612 |
| S7 | S3 AND S6                                                                                                                                                                                                                                                                                                                                                                                                                                                                                                                                            | 13   |

## 16. Gender Studies Database

### Coverage: from 1881 to April 25<sup>th</sup> 2024

Date of retrieval: 25-04-2024

|    |                                                                                                                                                                                                                                                                                                                                                                                                                                                                                                                |       |
|----|----------------------------------------------------------------------------------------------------------------------------------------------------------------------------------------------------------------------------------------------------------------------------------------------------------------------------------------------------------------------------------------------------------------------------------------------------------------------------------------------------------------|-------|
| S1 | "art intervention*" OR "art therap*" OR "art treatment*" OR "music therap*" OR "visual arts intervention*" OR "dance therap*" OR "movement therap*" OR "creative arts therap*" OR "recreation therap*" OR "educational therap*" OR "expressive psychotherap*" OR "expressive therap*" OR "narrative therap*" OR "poetry therap*" OR (dramatherap* OR drama-therap* OR "drama therap*") OR "healing circle*" OR storytell* OR self#expression OR yarn* OR (beading OR beadwork*) OR drum* OR wampum             | 5248  |
| S2 | SU ("art therapy" OR self-expression OR "music therapy" OR "expressive arts therapy" OR "dance therapy" OR "dance therapy for children" OR "drama therapy" OR "educational therapy" OR "narrative therapy" OR "poetry therapy" OR "healing circles" OR storytelling OR narratives OR beadwork OR wampum)                                                                                                                                                                                                       | 9982  |
| S3 | S1 OR S2                                                                                                                                                                                                                                                                                                                                                                                                                                                                                                       | 13976 |
| S4 | aborigin* OR indigenous OR ("first nation" OR "first nations") OR "first people*" OR ((canadian OR american OR mexican OR australia* OR alaska* OR hawaii* OR plain*) NEAR/2 (indian* OR native*)) OR "plains indian*" OR abenaki* OR maya* OR navajo OR quechua* OR Maori OR (inuit* OR innuit* OR innuk*) OR "torres strait islander people" OR m?tis OR "pacific Islander*" OR eskimo* OR (pima OR pimas) OR "oceanic ancestry" OR cherokee* OR two-spirit*                                                 | 21010 |
| S5 | SU ("aboriginal australian art" OR "aboriginal australian artists" OR "indigenous australians" OR "indigenous children" OR "first nations of canada" OR "mexican indigenous women" OR "abenaki (north american people)" OR maya OR "navajo (north american people)" OR "quechua (south american people)" OR "maori (new zealand people)" OR inuit OR "torres strait islanders" OR metis OR "pacific islanders" OR "pima (north american people)" OR "cherokee (north american people)" OR "two-spirit people") | 2828  |
| S6 | S4 OR S5                                                                                                                                                                                                                                                                                                                                                                                                                                                                                                       | 21013 |
| S7 | S3 AND S6                                                                                                                                                                                                                                                                                                                                                                                                                                                                                                      | 313   |
| S8 | (indigenous OR aboriginal OR native) W5 (healing OR recover*)                                                                                                                                                                                                                                                                                                                                                                                                                                                  | 124   |
| S9 | S7 OR S8                                                                                                                                                                                                                                                                                                                                                                                                                                                                                                       | 435   |

**17. Social Sciences Abstracts****Coverage from 1952 to April 25<sup>th</sup> 2024**

Date of retrieval: 25-04-2024

|    |                                                                                                                                                                                                                                                                                                                                           |      |
|----|-------------------------------------------------------------------------------------------------------------------------------------------------------------------------------------------------------------------------------------------------------------------------------------------------------------------------------------------|------|
| S1 | "art therap*" OR "art intervention*" OR "art treatment*" OR "music therap*" OR "dance therap*" OR "movement therap*" OR "creative arts therap*" OR "poetry therap*" OR (dramatherap* OR drama-therap* OR "drama therap*") OR "recreation therap*" OR "play therap*" OR "educational therap*" OR "expressive psychotherap*" OR "expressive | 3615 |
|----|-------------------------------------------------------------------------------------------------------------------------------------------------------------------------------------------------------------------------------------------------------------------------------------------------------------------------------------------|------|

|    |                                                                                                                                                                                                                                                                                                                                                              |       |
|----|--------------------------------------------------------------------------------------------------------------------------------------------------------------------------------------------------------------------------------------------------------------------------------------------------------------------------------------------------------------|-------|
|    | therap*" OR "narrative therap*" OR "narrative practice*" OR "healing circle*" OR "healing art*" OR self#expression OR "creative writing" OR peacemak*                                                                                                                                                                                                        |       |
| S2 | SU (Storytelling OR Self-expression OR "Recreational therapy")                                                                                                                                                                                                                                                                                               | 1629  |
| S3 | S1 OR S2                                                                                                                                                                                                                                                                                                                                                     | 5174  |
| S4 | (canadian OR american OR mexican OR australian* OR alaska* OR hawaii* OR plain*) N2 (indian* OR native*) OR indigenous OR "first people*" OR "plains indian*" OR abenaki* OR navajo OR quechua* OR Maori OR (in?uit* OR innuk*) OR "torres strait islander people*" OR m?tis OR eskimo* OR (pima OR pimas) OR "oceanic ancestry" OR cherokee* OR two-spirit* | 30903 |
| S5 | SU ("Indigenous peoples" OR "Indigenous youth" OR "Aboriginal peoples' reservations" OR "Indigenous children" OR "Indigenous peoples of the Americas" OR "Native Americans" OR "Native American women" OR "First Nations of Canada" OR "Native American families" OR "Maori ethic identity" OR Métis OR Eskimos OR "Ethnic identity of Cherokee Indians")    | 9360  |
| S6 | S4 OR S5                                                                                                                                                                                                                                                                                                                                                     | 31911 |
| S7 | S3 AND S6                                                                                                                                                                                                                                                                                                                                                    | 122   |
| S8 | (indigenous OR aboriginal OR native) W5 (healing OR recover*)                                                                                                                                                                                                                                                                                                | 99    |
| S9 | S7 OR S8                                                                                                                                                                                                                                                                                                                                                     | 219   |

## 18. Social Work Abstracts

Coverage: 1965 to April 25<sup>th</sup> 2024

Date of retrieval: 25-04-2024

|    |                                                                                                                                                                                                                                                                                                                                                                                                                                                                                       |      |
|----|---------------------------------------------------------------------------------------------------------------------------------------------------------------------------------------------------------------------------------------------------------------------------------------------------------------------------------------------------------------------------------------------------------------------------------------------------------------------------------------|------|
| S1 | "art therap*" OR "art intervention*" OR "art treatment*" OR "music therap*" OR "dance therap*" OR "movement therap*" OR "creative arts therap*" OR "poetry therap*" OR (dramatherap* OR drama-therap* OR "drama therap*") OR "recreation therap*" OR "play therap*" OR "educational therap*" OR "expressive psychotherap*" OR "expressive therap*" OR "narrative therap*" OR "narrative practice*" OR circle* OR "healing art*" OR self-expression OR "creative writing" OR peacemak* | 457  |
| S2 | SU ("art therapy" OR arts OR "music therapy" OR "narrative therapy" OR narratives OR "digital storytelling" OR storytelling OR self-expression OR "poetry therapy" OR "play therapy")                                                                                                                                                                                                                                                                                                 | 703  |
| S3 | S1 OR S2                                                                                                                                                                                                                                                                                                                                                                                                                                                                              | 1007 |
| S4 | (canadian OR american OR mexican OR australian* OR alaska* OR hawaii* OR plain*) N2 (indian* OR native*) OR indigenous OR "first people*" OR "plains indian*" OR abenaki* OR navajo OR quechua* OR Maori OR (in?uit* OR innuk*) OR "torres strait                                                                                                                                                                                                                                     | 1015 |



|    |                                                                                                                                                                |     |
|----|----------------------------------------------------------------------------------------------------------------------------------------------------------------|-----|
|    | islander people" OR m?tis OR eskimo* OR (pima OR pimas) OR "oceanic ancestry" OR cherokee* OR two-spirit*                                                      |     |
| S5 | SU (indigenous OR "american indians" OR "alaska natives" OR aboriginals OR "pacific islanders" OR "native hawaiians" OR "first nations" OR "native americans") | 475 |
| S6 | S4 OR 75                                                                                                                                                       | 958 |
| S7 | S3 AND S6                                                                                                                                                      | 17  |

19. Web of Sciences Core Collection

Editions searched: Science Citations Index Expanded, Social Sciences Citation Index, Arts & Humanities Citation Index, Emerging Sources Citation Index

Coverage: 1965 to April 25<sup>th</sup> 2024

Date of retrieval: 25-04-2024

(TS=("art intervention\*" OR "art treatment\*" OR "music therap\*" OR "dance therap\*" OR "movement therap\*" OR "poetry therap\*" OR "visual arts intervention\*" OR "visual arts therap\*" OR "creative arts therap\*" OR (drama?therap\* OR "drama therap\*") OR "recreation therap\*" OR "play therap\*" OR "educational therap\*" OR "expressive psychotherap\*" OR "expressive therap\*" OR "narrative therap\*" OR "narrative practice\*" OR "healing circle\*" OR "healing art\*" OR self?expression OR "creative writing" OR (beading OR beadwork) OR yarn\* OR drum\*)) AND TS=((aborigin\* OR indigenous OR ("first nation" OR "first nations") OR "first people\*" OR "american indian\*" OR "canadian indian\*" OR "mexican indian\*" OR "south american indian\*" OR "central american indian" OR "australian indian\*" OR "new-zeland indian\*" OR "plain indian\*" OR "native american\*" OR "canadian native\*" OR "mexican native\*" OR "south american native\*" OR "central american native\*" OR "australian native\*" OR "new-zeland native\*" OR "alaska native\*" OR "hawaiian native\*" OR maya\* OR navajo OR quechua\* OR Maori OR (inuit\* OR innuit\* OR innuk\*) OR "torres strait islander people" OR m?tis OR "pacific Islander\*" OR eskimo\* OR (pima OR pimas) OR "oceanic ancestry" OR cherokee\* OR two-spirit\* OR Na-Dene OR Athabaska OR Haida OR Tlingit))

Number of results: 1034

French-language databases

20. Érudit

Coverage: from 1944 to April 25<sup>th</sup> 2024

Date of retrieval: 25-04-2024

Date of retrieval: 25-04-2024

|    |                                                                                                                                                                                                                                                                |      |
|----|----------------------------------------------------------------------------------------------------------------------------------------------------------------------------------------------------------------------------------------------------------------|------|
| S1 | "intervention par l'art" OR (thérapie ET art) OR "traitement par l'art" OR (thérapie ET musique) OR "interventions artistiques" OR (thérapie ET danse) OR (thérapie* ET mouvement*) OR "intervention par le mouvement" OR (thérapie* ET jeu*) OR "intervention | 9951 |
|----|----------------------------------------------------------------------------------------------------------------------------------------------------------------------------------------------------------------------------------------------------------------|------|

en art" OR (rituel\* ET guérison) OR "art communautaire" OR "éducation populaire" OR "démarche artistique" OR (thérap\* ET chant\*) OR dramathérap\* OR (thérapie ET théâtre) OR ("thérapie ET jeu") OR ("cercle de guérison" OU "cercles de guérison") OR ((thérapies ET art) OU "art thérapie") OR "pratiques alternatives"

|    |                                                                                                                                                                                                                                                                                                                 |       |
|----|-----------------------------------------------------------------------------------------------------------------------------------------------------------------------------------------------------------------------------------------------------------------------------------------------------------------|-------|
| S2 | autochtone* OR "Premières nations" OR amériendien* OR inuit OR aborigène* OR "Premiers peuples" OR innu* OR bispiritualité OR ("Nation métisse" OR Métis) OR atikamekw OR mohawk* OR huron* OR algonquin* OR micmac* OR abénaquis* OR malécite* OR naskapis* OR Maori OR anishinaabe* OR haudenosau* OR ojibwe* | 27241 |
|----|-----------------------------------------------------------------------------------------------------------------------------------------------------------------------------------------------------------------------------------------------------------------------------------------------------------------|-------|

|    |           |      |
|----|-----------|------|
| S3 | S1 AND S2 | 1770 |
|----|-----------|------|

Results : 1770
